# Supplementary material for: Solvent-independent determination of heteroatom protonation states from NMR spectra by differential deuterium isotope shifts
Source: Royal Society of Chemistry journal article supplement (doi:10.1039/c9an01364d), 2019-01-01
Supplement: c9an01364d1.pdf [file c9an01364d1.pdf]

## Supporting Information

Solvent-independent Determination of Heteroatom Protonation States from  
NMR Spectra by Differential Deuterium Isotope Shifts

*Sebastian Tassoti,<sup>a</sup> Martin Walenta,<sup>a</sup> Alexander Pöcheim,<sup>a</sup> Kathrin Buchberger,<sup>a</sup>  
Olaf Kunert<sup>b</sup> and Klaus Zangger<sup>\*,a</sup>*

<sup>a</sup>Institute of Chemistry / Organic and Bioorganic Chemistry, University of Graz, Austria.

<sup>b</sup> Institute of Pharmaceutical Sciences, University of Graz, Austria

\*to whom correspondence should be addressed at:

Institute of Chemistry / Organic and Bioorganic Chemistry, University of Graz

Heinrichstraße 28

A-8010 Graz, Austria

E-Mail: klaus.zangger@uni-graz.at

Tel: 0043 316 380 8673

**Table S1.** DIS-values (given in ppm) of various compounds measured in three representative deuterated solvents (methanol, pyridine and chloroform).

| Compound Name               | Solvent                 | C-1   | C-2   | C-3   | C-4   | C-5   | C-6   | C-7   | C-8   | C-9   | C-10 | C-11 | C-12 |
|-----------------------------|-------------------------|-------|-------|-------|-------|-------|-------|-------|-------|-------|------|------|------|
| butane-2,3-diol             | methanol-d <sub>4</sub> | 0.05  | 0.09  |       |       |       |       |       |       |       |      |      |      |
|                             | chloroform-d            | 0.06  | 0.12  |       |       |       |       |       |       |       |      |      |      |
|                             | pyridine-d <sub>5</sub> | 0.06  | 0.11  |       |       |       |       |       |       |       |      |      |      |
| butane-1-ol                 | methanol-d <sub>4</sub> | 0.10  | 0.02  | -0.01 | 0.00  |       |       |       |       |       |      |      |      |
|                             | chloroform-d            | 0.16  | 0.05  | -0.03 | -0.01 |       |       |       |       |       |      |      |      |
|                             | pyridine-d <sub>5</sub> | 0.12  | -0.02 | -0.03 | -0.01 |       |       |       |       |       |      |      |      |
| iso-butanol                 | methanol-d <sub>4</sub> | 0.13  | 0.05  | 0.00  |       |       |       |       |       |       |      |      |      |
|                             | chloroform-d            | 0.15  | 0.04  | -0.01 |       |       |       |       |       |       |      |      |      |
|                             | pyridine-d <sub>5</sub> | 0.13  | 0.05  | 0.01  |       |       |       |       |       |       |      |      |      |
| 2-(2-ethoxyethoxy)ethanol   | methanol-d <sub>4</sub> | 0.12  | 0.03  | 0.00  | 0.00  | 0.00  | 0.01  |       |       |       |      |      |      |
|                             | chloroform-d            | 0.12  | 0.01  | 0.00  | 0.00  | 0.00  | 0.00  |       |       |       |      |      |      |
|                             | pyridine-d <sub>5</sub> | 0.12  | 0.04  | 0.01  | 0.01  | 0.00  | 0.01  |       |       |       |      |      |      |
| 2-phenoxyethanol            | methanol-d <sub>4</sub> | 0.06  | -0.01 | -0.05 | -0.03 | -0.02 | -0.02 |       |       |       |      |      |      |
|                             | chloroform-d            | 0.14  | 0.02  | 0.01  | 0.00  | 0.00  | 0.00  |       |       |       |      |      |      |
|                             | pyridine-d <sub>5</sub> | 0.11  | 0.04  | 0.00  | 0.00  | 0.00  | 0.00  |       |       |       |      |      |      |
| dimethoxyethane             | methanol-d <sub>4</sub> | 0.00  | 0.00  |       |       |       |       |       |       |       |      |      |      |
|                             | chloroform-d            | 0.00  | 0.00  |       |       |       |       |       |       |       |      |      |      |
|                             | pyridine-d <sub>5</sub> | 0.00  | 0.00  |       |       |       |       |       |       |       |      |      |      |
| 1,4-benzodioxane-6-amine    | methanol-d <sub>4</sub> | -0.01 | 0.00  | -0.01 | 0.00  | 0.09  | 0.01  | -0.01 | -0.04 |       |      |      |      |
|                             | chloroform-d            | -0.01 | 0.00  | 0.00  | 0.00  | 0.11  | 0.02  | 0.00  | -0.02 |       |      |      |      |
|                             | pyridine-d <sub>5</sub> | 0.01  | 0.01  | 0.01  | 0.00  | 0.13  | 0.02  | 0.01  | -0.03 |       |      |      |      |
| 1-adamantylamine            | methanol-d <sub>4</sub> | 0.13  | 0.09  | -0.01 | 0.02  |       |       |       |       |       |      |      |      |
|                             | chloroform-d            | 0.22  | 0.06  | -0.01 | 0.01  |       |       |       |       |       |      |      |      |
|                             | pyridine-d <sub>5</sub> | 0.21  | 0.08  | -0.01 | 0.01  |       |       |       |       |       |      |      |      |
| benzylamine                 | methanol-d <sub>4</sub> | 0.13  | -0.09 | -0.06 | -0.06 | -0.08 |       |       |       |       |      |      |      |
|                             | chloroform-d            | 0.15  | -0.03 | -0.02 | -0.02 | -0.02 |       |       |       |       |      |      |      |
|                             | pyridine-d <sub>5</sub> | 0.21  | 0.03  | 0.05  | 0.03  | 0.04  |       |       |       |       |      |      |      |
| 1-aminoundane               | methanol-d <sub>4</sub> | 0.18  | 0.04  | -0.01 | -0.02 | 0.00  | 0.02  | 0.01  | 0.00  | -0.03 |      |      |      |
|                             | chloroform-d            | 0.15  | 0.02  | -0.03 | 0.00  | -0.01 | -0.01 | -0.02 | -0.02 | -0.01 |      |      |      |
|                             | pyridine-d <sub>5</sub> | 0.18  | 0.08  | -0.01 | -0.02 | 0.00  | 0.00  | 0.00  | -0.01 | 0.02  |      |      |      |
| dimethylamine               | methanol-d <sub>4</sub> | 0.06  | 0.00  |       |       |       |       |       |       |       |      |      |      |
|                             | chloroform-d            | 0.19  | 0.07  |       |       |       |       |       |       |       |      |      |      |
|                             | pyridine-d <sub>5</sub> | 0.10  | 0.03  |       |       |       |       |       |       |       |      |      |      |
| cyclohexylamine             | methanol-d <sub>4</sub> | 0.18  | 0.06  | 0.01  | 0.02  |       |       |       |       |       |      |      |      |
|                             | chloroform-d            | 0.22  | 0.10  | 0.01  | 0.03  |       |       |       |       |       |      |      |      |
|                             | pyridine-d <sub>5</sub> | 0.18  | 0.07  | -0.01 | 0.01  |       |       |       |       |       |      |      |      |
| 2-(methylamino)ethanol      | methanol-d <sub>4</sub> | 0.06  | 0.06  | 0.05  |       |       |       |       |       |       |      |      |      |
|                             | chloroform-d            | 0.03  | 0.10  | 0.07  |       |       |       |       |       |       |      |      |      |
|                             | pyridine-d <sub>5</sub> | 0.11  | 0.12  | 0.09  |       |       |       |       |       |       |      |      |      |
| 2-(methoxyethyl)methylamine | methanol-d <sub>4</sub> | 0.04  | -0.02 | 0.08  | 0.00  |       |       |       |       |       |      |      |      |
|                             | chloroform-d            | 0.07  | -0.01 | 0.09  | 0.01  |       |       |       |       |       |      |      |      |
|                             | pyridine-d <sub>5</sub> | 0.10  | 0.01  | 0.10  | 0.00  |       |       |       |       |       |      |      |      |

**Table S2.** DIS-values (given in ppm) of 1,2;5,6-di-*O*-isopropylglucofuranose measured in a range of deuterated solvents. Note that C-3 is the  $\alpha$ -carbon of the hydroxy-group. A total of five ethers are present.

| Compound Name                                | Solvent                 | C-1   | C-2   | C-3  | C-4  | C-5   | C-6   | C-7   | C-8   | C-9   | C-10  | C-11  | C-12  |
|----------------------------------------------|-------------------------|-------|-------|------|------|-------|-------|-------|-------|-------|-------|-------|-------|
| 1,2;5,6-di- <i>O</i> -isopropylglucofuranose | methanol-d <sub>4</sub> | -0.02 | 0.00  | 0.06 | 0.01 | -0.02 | -0.01 | -0.01 | 0.00  | 0.00  | 0.00  | -0.01 | -0.01 |
|                                              | chloroform-d            | -0.01 | 0.03  | 0.10 | 0.01 | -0.04 | -0.01 | 0.01  | -0.01 | 0.00  | 0.00  | 0.00  | -0.10 |
|                                              | pyridine-d <sub>5</sub> | -0.01 | 0.01  | 0.09 | 0.02 | -0.01 | -0.02 | 0.01  | 0.00  | -0.01 | 0.00  | 0.00  | -0.01 |
|                                              | DCM-d <sub>2</sub>      | 0.00  | 0.03  | 0.10 | 0.02 | -0.04 | -0.01 | 0.01  | 0.00  | 0.01  | -0.01 | 0.00  | 0.01  |
|                                              | ACN-d <sub>3</sub>      | 0.01  | 0.04  | 0.12 | 0.03 | 0.01  | 0.01  | -0.01 | 0.01  | 0.01  | -0.01 | 0.01  | 0.01  |
|                                              | THF-d <sub>8</sub>      | -0.01 | 0.02  | 0.11 | 0.01 | -0.01 | 0.00  | 0.01  | 0.00  | 0.00  | 0.01  | 0.01  | 0.00  |
|                                              | acetone-d <sub>6</sub>  | -0.02 | -0.02 | 0.08 | 0.00 | -0.03 | -0.03 | 0.01  | -0.03 | -0.03 | 0.01  | -0.02 | -0.02 |
|                                              | DMSO-d <sub>6</sub>     | 0.01  | 0.04  | 0.10 | 0.03 | 0.00  | 0.00  | 0.01  | 0.01  | 0.01  | -0.01 | 0.01  | 0.01  |
|                                              | toluene-d <sub>8</sub>  | -0.01 | 0.02  | 0.10 | 0.02 | -0.02 | 0.00  | 0.01  | 0.00  | 0.01  | -0.01 | 0.01  | 0.01  |
